# Supplementary material for: Effects of load mass and size on cooperative transport in ants over multiple transport challenges
Source: Oxford University Press journal article supplement (doi:10.1242/jeb.206821), 2019-01-01
Supplement: jeb206821supp.pdf [file jeb206821supp.pdf]

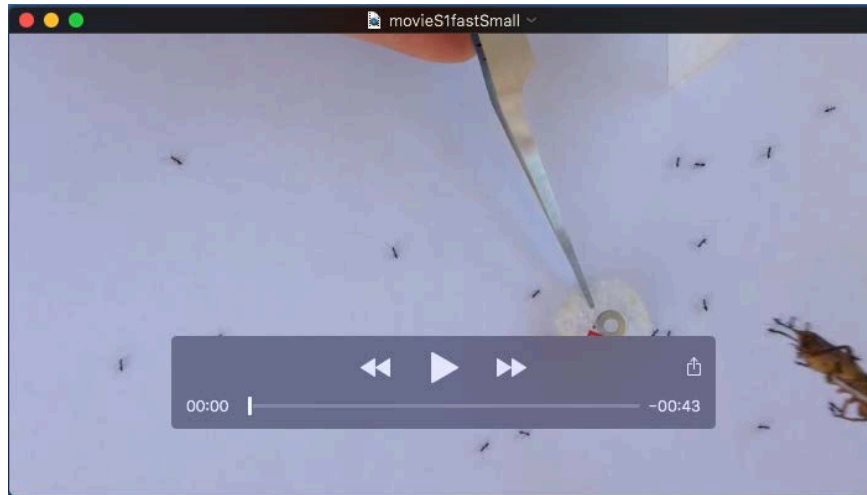

**Movie 1:** Examples of trials. Shows movement initiation and obstacle navigation for two different bait objects, one of moderate mass and one very heavy.

**Figure S1:** Effects of mass per ant and object size on sinuosity at movement initiation (A, B; multiple high-performing models, results included in Table 3) and after hitting an obstacle (C, D;  $\Delta AIC$  for null model < 2).

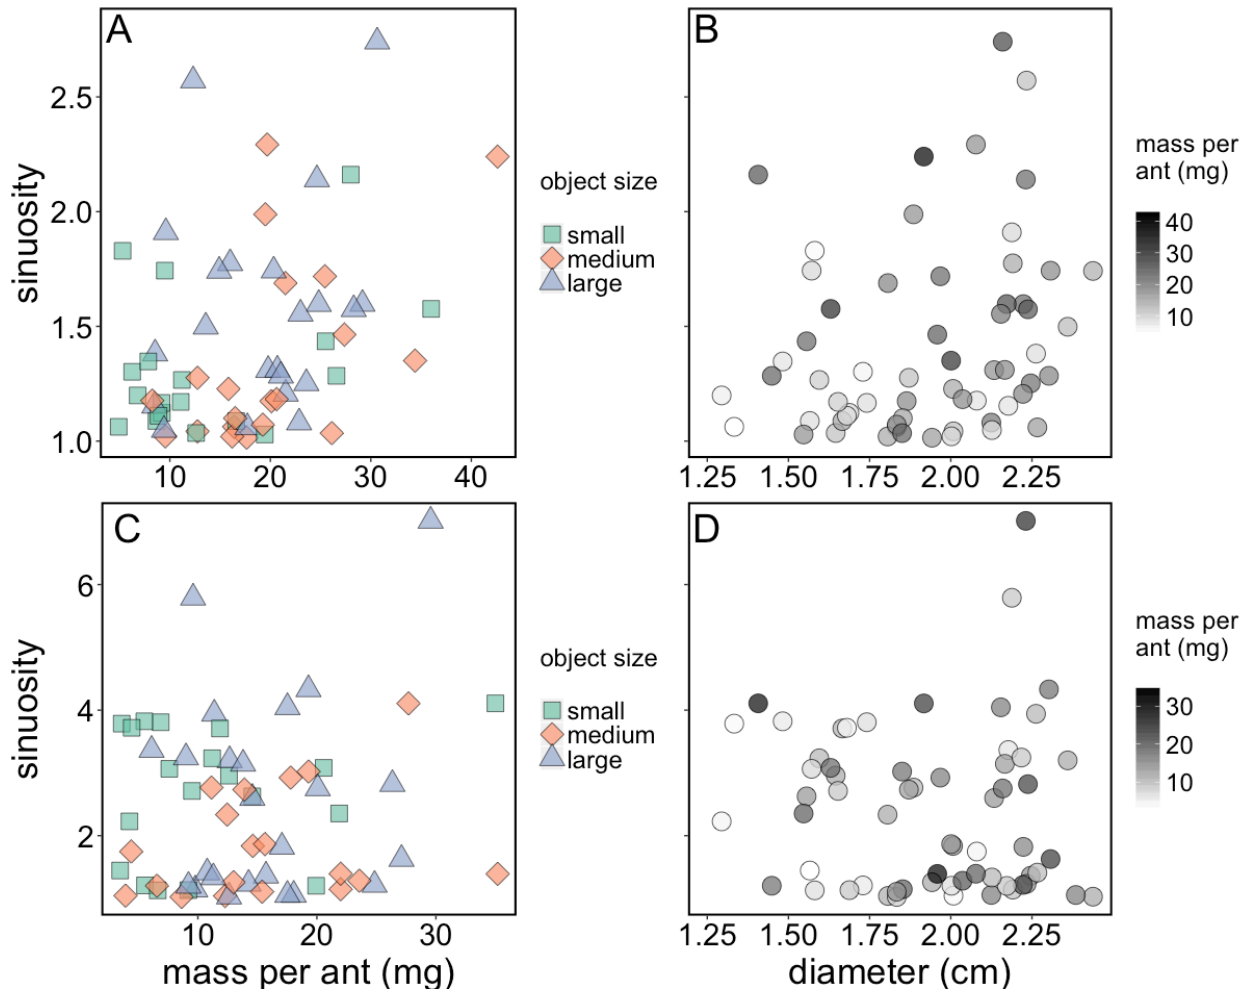

**Figure S2:** Effects of mass per ant (A) and object size (B) on velocity during obstacle navigation. Multiple models perform well, results included in Tables 3, S1, S2, and S3.

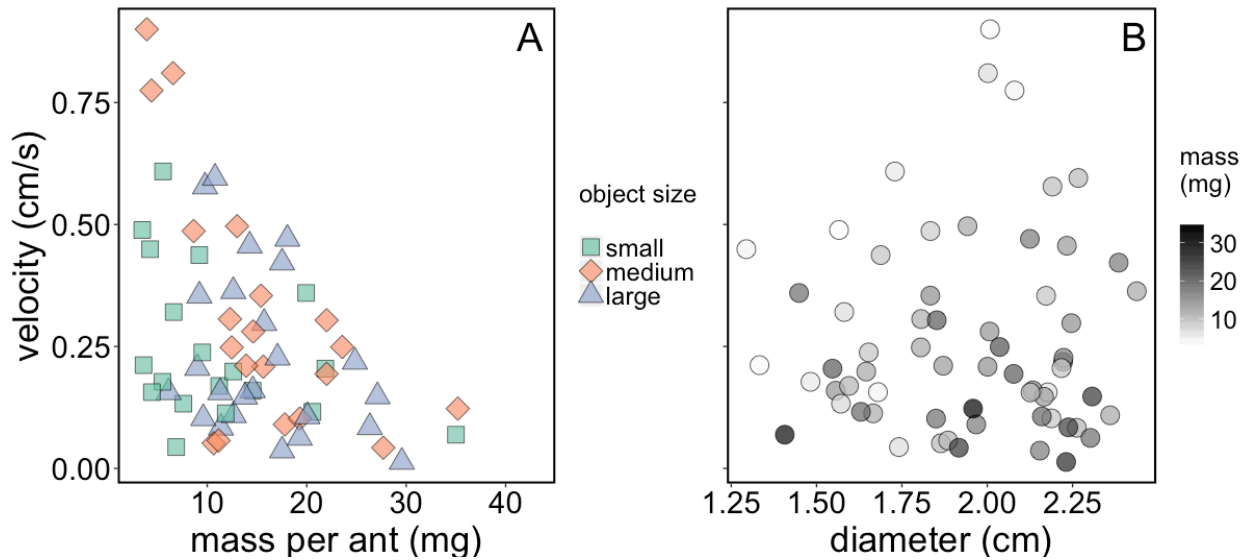

**Figure S3:** Proportion of time stalled at movement initiation and during obstacle navigation. Points are jittered. Black points are trials with no stalls in either external context ( $n = 47$ ), blue points show trials in which there was at least one stall either at the start or during obstacle navigation ( $n = 13$ ), and red points show trials with at least one stall in both phases ( $n = 3$ ). Stalls were rare, and there were too few examples for statistical analysis.

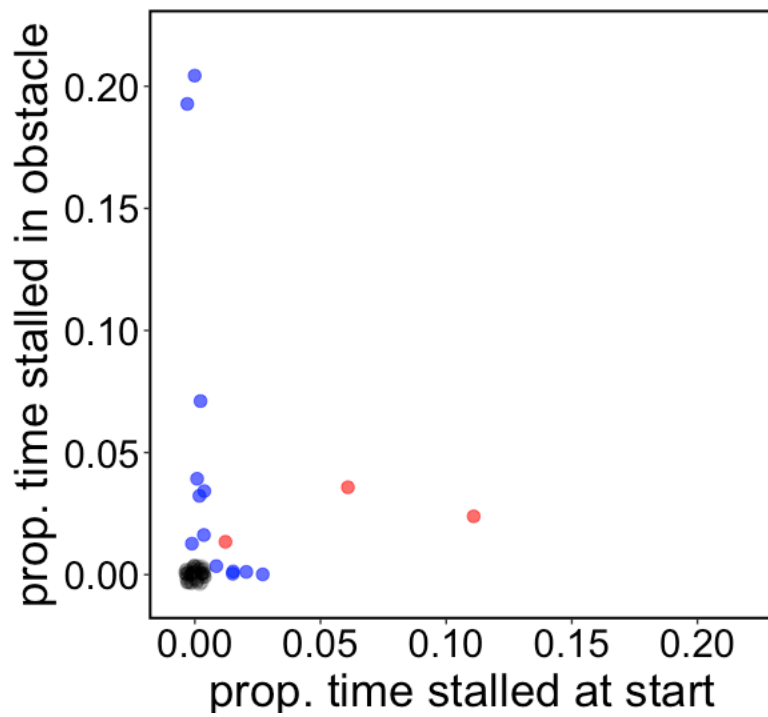

**Figure S4:** Reproduction of Figure 2a, on log-log scale. Because *Paratrechina longicornis* are monomorphic, group size is proportional to the total mass of the porter group.

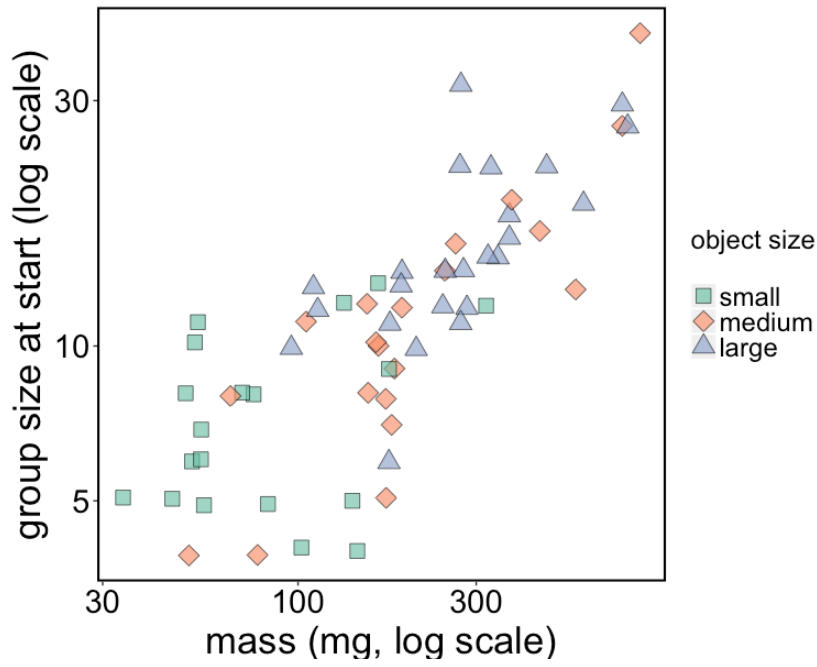

**Table S1:**  $\Delta$ AICc and Akaike weights for all models tested as part of all statistical analyses. For comparisons among candidate models, models were fit using maximum likelihood. Final models were refit with restricted maximum likelihood. Table continues onto second page.

| Predictors                                                  | $\Delta$ AICc | Akaike Weight |
|-------------------------------------------------------------|---------------|---------------|
| <b>Group Size: During movement initiation</b>               |               |               |
| Mass + Size                                                 | 0             | 0.760         |
| Mass + Size + Mass:Size                                     | 2.33          | 0.237         |
| Mass                                                        | 11.0          | 0.003         |
| Size                                                        | 40.7          | 0.000         |
| Null                                                        | 67.1          | 0.000         |
| <b>Group Size: During obstacle navigation</b>               |               |               |
| Mass + Size                                                 | 0             | 0.754         |
| Mass + Size + Mass:Size                                     | 2.25          | 0.245         |
| Mass                                                        | 13.4          | 0.001         |
| Size                                                        | 22.3          | 0.000         |
| Null                                                        | 50.7          | 0.000         |
| <b>Group Size: Initiation vs obstacle navigation</b>        |               |               |
| Trial type (initiation vs obstacle)                         | 0             | 1             |
| Null                                                        | 26.1          | 0             |
| <b>Coordination time: During movement initiation</b>        |               |               |
| Mass per ant (MPA) + Size                                   | 0             | 0.754         |
| MPA + Size + MPA:Size                                       | 2.35          | 0.233         |
| MPA                                                         | 8.91          | 0.009         |
| Size                                                        | 10.6          | 0.004         |
| Null                                                        | 21.6          | 0.000         |
| <b>Coordination time: During obstacle navigation</b>        |               |               |
| MPA + Size + MPA:Size                                       | 0             | 0.402         |
| MPA                                                         | 0.174         | 0.369         |
| MPA + Size                                                  | 1.12          | 0.229         |
| Null                                                        | 58.2          | 0.000         |
| Size                                                        | 60.0          | 0.000         |
| <b>Coordination time: Initiation vs obstacle navigation</b> |               |               |
| Trial type (initiation vs obstacle)                         | 0             | 1             |
| Null                                                        | 56.4          | 0             |
| <b>Sinuosity: During movement initiation</b>                |               |               |
| MPA                                                         | 0             | 0.461         |
| MPA + Size                                                  | 0.949         | 0.287         |
| Size                                                        | 3.56          | 0.086         |
| MPA + Size + MPA:Size                                       | 3.40          | 0.084         |
| Null                                                        | 3.43          | 0.083         |
| <b>Sinuosity: During obstacle navigation</b>                |               |               |
| Size                                                        | 0             | 0.384         |
| Null                                                        | 0.636         | 0.280         |
| MPA + Size                                                  | 1.63          | 0.170         |
| MPA                                                         | 2.70          | 0.100         |
| MPA + Size + MPA:Size                                       | 3.50          | 0.067         |
| <b>Sinuosity: Initiation vs obstacle navigation</b>         |               |               |
| Trial type (initiation vs obstacle)                         | 0             | 1             |
| Null                                                        | 29.5          | 0             |

| Predictors                                         | $\Delta$ AICc | Akaike Weight |
|----------------------------------------------------|---------------|---------------|
| <b>Velocity: During movement initiation</b>        |               |               |
| <i>MPA + Size</i>                                  | 0             | 0.568         |
| <i>MPA</i>                                         | 1.65          | 0.250         |
| <i>MPA + Size + MPA:Size</i>                       | 2.28          | 0.182         |
| <i>Size</i>                                        | 40.9          | 0.000         |
| <i>Null</i>                                        | 45.1          | 0.000         |
| <b>Velocity: During obstacle navigation</b>        |               |               |
| <i>MPA</i>                                         | 0             | 0.601         |
| <i>MPA + Size</i>                                  | 1.97          | 0.224         |
| <i>MPA + Size + MPA:Size</i>                       | 2.51          | 0.172         |
| <i>Null</i>                                        | 11.2          | 0.002         |
| <i>Size</i>                                        | 13.4          | 0.001         |
| <b>Velocity: Initiation vs obstacle navigation</b> |               |               |
| <i>Trial type (initiation vs obstacle)</i>         | 0             | 1             |
| <i>Null</i>                                        | 24.0          | 0             |

**Table S2:** Combined Akaike weights of models including each predictor (predictor weights). Weights calculated using the full suite of models of each analysis.

| Akaike weight for predictor                   | Mass                       | Size  | Interaction |
|-----------------------------------------------|----------------------------|-------|-------------|
| Group Size: <i>Movement initiation</i>        | 1.00                       | 0.997 | 0.237       |
|                                               | <i>Obstacle navigation</i> | 1.00  | 0.999       |
|                                               | Mass per ant               | Size  | Interaction |
| Coordination time: <i>Movement initiation</i> | 0.996                      | 0.991 | 0.233       |
|                                               | <i>Obstacle navigation</i> | 1.00  | 0.631       |
| Sinuosity: <i>Movement initiation</i>         | 0.832                      | 0.457 | 0.084       |
|                                               | <i>Obstacle navigation</i> | 0.337 | 0.621       |
| Velocity: <i>Movement initiation</i>          | 1.00                       | 0.750 | 0.182       |
|                                               | <i>Obstacle navigation</i> | 0.997 | 0.397       |

**Table S3:** Detailed statistical results for all analyses, including details of all models with  $\Delta AICc < 2$ . All estimates are reported on log scale. Table continues onto 4 pages total.

|                                                                                                                           |           | Std. dev.<br>(for random effects) | Estimate |
|---------------------------------------------------------------------------------------------------------------------------|-----------|-----------------------------------|----------|
| <b>Group size: movement initiation</b>                                                                                    |           |                                   |          |
| <b>Mass + Size (final model):</b>                                                                                         |           |                                   |          |
| <i>Linear mixed-effects model fit by restricted maximum likelihood (REML), 63 observations across 6 colonies, DF = 55</i> |           |                                   |          |
| Random effect (acting on intercept)                                                                                       | Colony    | 0.144                             | -        |
|                                                                                                                           | Residual  | 0.298                             | -        |
| Fixed effects                                                                                                             | Intercept | -                                 | 2.36     |
|                                                                                                                           | Mass      | -                                 | 1.84     |
|                                                                                                                           | Size      | -                                 | 0.596    |
| <b>Group size: obstacle navigation</b>                                                                                    |           |                                   |          |
| <b>Mass + Size (final model):</b>                                                                                         |           |                                   |          |
| <i>Linear mixed-effects model fit by REML, 63 observations across 6 colonies, DF = 55</i>                                 |           |                                   |          |
| Random effect (acting on intercept)                                                                                       | Colony    | 0.0769                            | -        |
|                                                                                                                           | Residual  | 0.298                             | -        |
| Fixed effects                                                                                                             | Intercept | -                                 | 2.62     |
|                                                                                                                           | Mass      | -                                 | 1.25     |
|                                                                                                                           | Size      | -                                 | 0.625    |
| <b>Group size: initiation vs obstacle navigation</b>                                                                      |           |                                   |          |
| <b>Trial type (start or obstacle), final model:</b>                                                                       |           |                                   |          |
| <i>Linear mixed-effects model fit by REML, 126 observations, 63 trials nested within 6 colonies, DF = 62</i>              |           |                                   |          |
| Random effects (acting on intercept)                                                                                      | Colony    | 0.137                             | -        |
|                                                                                                                           | Trial     | 0.435                             | -        |
|                                                                                                                           | Residual  | 0.238                             | -        |
| Fixed effects                                                                                                             | Intercept | -                                 | 2.36     |
|                                                                                                                           | Obstacle  | -                                 | 0.25     |
| <b>Coordination time: movement initiation</b>                                                                             |           |                                   |          |
| <b>Mass per ant (MPA) + Size (final model):</b>                                                                           |           |                                   |          |
| <i>Linear mixed-effects model fit by REML, 63 observations across 6 colonies, DF = 55</i>                                 |           |                                   |          |
| Random effect (acting on intercept)                                                                                       | Colony    | 5.87 e-5                          | -        |
|                                                                                                                           | Residual  | 1.05                              | -        |
| Fixed effects                                                                                                             | Intercept | -                                 | 3.38     |
|                                                                                                                           | MPA       | -                                 | 62.1     |
|                                                                                                                           | Size      | -                                 | 1.61     |

|                                                                                                              |           | Std. dev.<br>(for random effects) | Estimate |
|--------------------------------------------------------------------------------------------------------------|-----------|-----------------------------------|----------|
| <b>Coordination time: obstacle navigation</b>                                                                |           |                                   |          |
| <b>MPA + Size + MPA:Size (<math>\Delta AIC_c = 0</math>):</b>                                                |           |                                   |          |
| <i>Linear mixed-effects model fit by REML, 63 observations across 6 colonies, DF = 54</i>                    |           |                                   |          |
| Random effect (acting on intercept)                                                                          | Colony    | 0.379                             | -        |
|                                                                                                              | Residual  | 0.428                             | -        |
| Fixed effects                                                                                                | Intercept | -                                 | 2.04     |
|                                                                                                              | MPA       | -                                 | 78.8     |
|                                                                                                              | Size      | -                                 | -0.236   |
|                                                                                                              | MPA:Size  | -                                 | -43.2    |
| <b>MPA (<math>\Delta AIC_c = 0.174</math>):</b>                                                              |           |                                   |          |
| <i>Linear mixed-effects model fit by REML, 63 observations across 6 colonies, DF = 56</i>                    |           |                                   |          |
| Random effect (acting on intercept)                                                                          | Colony    | 0.392                             | -        |
|                                                                                                              | Residual  | 0.438                             | -        |
| Fixed effects                                                                                                | Intercept | -                                 | 2.02     |
|                                                                                                              | MPA       | -                                 | 80.3     |
| <b>MPA + Size (<math>\Delta AIC_c = 1.12</math>):</b>                                                        |           |                                   |          |
| <i>Linear mixed-effects model fit by REML, 63 observations across 6 colonies, DF = 55</i>                    |           |                                   |          |
| Random effect (acting on intercept)                                                                          | Colony    | 0.396                             | -        |
|                                                                                                              | Residual  | 0.436                             | -        |
| Fixed effects                                                                                                | Intercept | -                                 | 2.02     |
|                                                                                                              | MPA       | -                                 | 82.4     |
|                                                                                                              | Size      | -                                 | -0.24    |
| <b>Coordination time: initiation vs obstacle navigation</b>                                                  |           |                                   |          |
| <b>Trial type (start or obstacle), final model:</b>                                                          |           |                                   |          |
| <i>Linear mixed-effects model fit by REML, 126 observations, 63 trials nested within 6 colonies, DF = 62</i> |           |                                   |          |
| Random effects (acting on intercept)                                                                         | Colony    | 0.281                             | -        |
|                                                                                                              | Trial     | 0.611                             | -        |
|                                                                                                              | Residual  | 0.829                             | -        |
| Fixed effects                                                                                                | Intercept | -                                 | 3.41     |
|                                                                                                              | Obstacle  | -                                 | -1.43    |
| <b>Sinuosity: movement initiation</b>                                                                        |           |                                   |          |
| <b>MPA (<math>\Delta AIC_c = 0</math>):</b>                                                                  |           |                                   |          |
| <i>Linear mixed-effects model fit by REML, 61 observations across 6 colonies, DF = 54</i>                    |           |                                   |          |
| Random effect (acting on intercept)                                                                          | Colony    | 0.111                             | -        |
|                                                                                                              | Residual  | 0.219                             | -        |
| Fixed effects                                                                                                | Intercept | -                                 | 0.327    |
|                                                                                                              | MPA       | -                                 | 8.49     |
| <b>MPA + Size (<math>\Delta AIC_c = 0.949</math>):</b>                                                       |           |                                   |          |
| <i>Linear mixed-effects model fit by REML, 61 observations across 6 colonies, DF = 53</i>                    |           |                                   |          |
| Random effects (acting on intercept)                                                                         | Colony    | 0.104                             | -        |
|                                                                                                              | Residual  | 0.219                             | -        |
| Fixed effects                                                                                                | Intercept | -                                 | 0.326    |
|                                                                                                              | MPA       | -                                 | 7.81     |
|                                                                                                              | Size      | -                                 | 0.119    |



|                                                                                                              |           | Std. dev.<br>(for random effects) | Estimate |
|--------------------------------------------------------------------------------------------------------------|-----------|-----------------------------------|----------|
| <b>Sinuosity: obstacle navigation</b>                                                                        |           |                                   |          |
| <b>Size</b> ( $\Delta AIC_c = 0$ ):                                                                          |           |                                   |          |
| <i>Linear mixed-effects model fit by REML, 62 observations across 6 colonies, DF = 55</i>                    |           |                                   |          |
| Random effect (acting on intercept)                                                                          | Colony    | 0.234                             | -        |
|                                                                                                              | Residual  | 0.479                             | -        |
| Fixed effects                                                                                                | Intercept | -                                 | 0.763    |
|                                                                                                              | Size      | -                                 | -0.392   |
| <b>Null model</b> ( $\Delta AIC_c = 0.636$ ):                                                                |           |                                   |          |
| <i>Linear mixed-effects model fit by REML, 62 observations across 6 colonies, DF = 56</i>                    |           |                                   |          |
| Random effect (acting on intercept)                                                                          | Colony    | 0.201                             | -        |
|                                                                                                              | Residual  | 0.492                             | -        |
| Fixed effects                                                                                                | Intercept | -                                 | 0.757    |
| <b>MPA + Size</b> ( $\Delta AIC_c = 1.63$ ):                                                                 |           |                                   |          |
| <i>Linear mixed-effects model fit by REML, 62 observations across 6 colonies, DF = 54</i>                    |           |                                   |          |
| Random effect (acting on intercept)                                                                          | Colony    | 0.233                             | -        |
|                                                                                                              | Residual  | 0.481                             | -        |
| Fixed effects                                                                                                | Intercept | -                                 | 0.765    |
|                                                                                                              | MPA       | -                                 | 7.24     |
|                                                                                                              | Size      | -                                 | -0.432   |
|                                                                                                              |           |                                   |          |
| <b>Sinuosity: initiation vs obstacle navigation</b>                                                          |           |                                   |          |
| <b>Trial type (start or obstacle), final model:</b>                                                          |           |                                   |          |
| <i>Linear mixed-effects model fit by REML, 123 observations, 63 trials nested within 6 colonies, DF = 59</i> |           |                                   |          |
| Random effects (acting on intercept)                                                                         | Colony    | 0.166                             | -        |
|                                                                                                              | Trial     | 9.76 e-5                          | -        |
|                                                                                                              | Residual  | 0.384                             | -        |
| Fixed effects                                                                                                | Intercept | -                                 | 0.338    |
|                                                                                                              | Obstacle  | -                                 | 0.416    |
| <b>Velocity: movement initiation</b>                                                                         |           |                                   |          |
| <b>MPA + Size</b> ( $\Delta AIC_c = 0$ ):                                                                    |           |                                   |          |
| <i>Linear mixed-effects model fit by REML, 63 observations across 6 colonies, DF = 55</i>                    |           |                                   |          |
| Random effect (acting on intercept)                                                                          | Colony    | 1.34 e-5                          | -        |
|                                                                                                              | Residual  | 0.507                             | -        |
| Fixed effects                                                                                                | Intercept | -                                 | -1.10    |
|                                                                                                              | MPA       | -                                 | -62.2    |
|                                                                                                              | Size      | -                                 | -0.45    |
|                                                                                                              |           |                                   |          |
| <b>MPA</b> ( $\Delta AIC_c = 1.65$ ):                                                                        |           |                                   |          |
| <i>Linear mixed-effects model fit by REML, 63 observations across 6 colonies, DF = 56</i>                    |           |                                   |          |
| Random effect (acting on intercept)                                                                          | Colony    | 1.73 e-5                          | -        |
|                                                                                                              | Residual  | 0.519                             | -        |
| Fixed effects                                                                                                | Intercept | -                                 | -1.10    |
|                                                                                                              | MPA       | -                                 | -65.6    |

|                                                                                                              |           | Std. dev.<br>(for random effects) | Estimate |
|--------------------------------------------------------------------------------------------------------------|-----------|-----------------------------------|----------|
| <b>Velocity: obstacle navigation</b>                                                                         |           |                                   |          |
| <b>MPA (<math>\Delta AIC_c = 0</math>):</b>                                                                  |           |                                   |          |
| <i>Linear mixed-effects model fit by REML, 63 observations across 6 colonies, DF = 56</i>                    |           |                                   |          |
| Random effect (acting on intercept)                                                                          | Colony    | 0.204                             | -        |
|                                                                                                              | Residual  | 0.734                             | -        |
| Fixed effects                                                                                                | Intercept | -                                 | -1.66    |
|                                                                                                              | MPA       | -                                 | -48.1    |
| <b>MPA + Size (<math>\Delta AIC_c = 1.97</math>):</b>                                                        |           |                                   |          |
| <i>Linear mixed-effects model fit by REML, 63 observations across 6 colonies, DF = 55</i>                    |           |                                   |          |
| Random effect (acting on intercept)                                                                          | Colony    | 0.225                             | -        |
|                                                                                                              | Residual  | 0.735                             | -        |
| Fixed effects                                                                                                | Intercept | -                                 | -1.66    |
|                                                                                                              | MPA       | -                                 | -49.9    |
|                                                                                                              | Size      | -                                 | 0.234    |
| <b>Velocity: initiation vs obstacle navigation</b>                                                           |           |                                   |          |
| <b>Trial type (start or obstacle), final model:</b>                                                          |           |                                   |          |
| <i>Linear mixed-effects model fit by REML, 126 observations, 63 trials nested within 6 colonies, DF = 62</i> |           |                                   |          |
| Random effects (acting on intercept)                                                                         | Colony    | 0.232                             | -        |
|                                                                                                              | Trial     | 0.543                             | -        |
|                                                                                                              | Residual  | 0.545                             | -        |
| Fixed effects                                                                                                | Intercept | -                                 | -1.11    |
|                                                                                                              | Obstacle  | -                                 | -0.549   |
